# Supplementary material
Source: Research Square preprint supplement (doi:10.21203/rs.3.rs-9311189/v1)
Supplement: Supplementary file 1 [file 1ee99ad01f2763294001e60e.docx]

Table Caption

Table 1. Statistical summary of hydrochemical parameters in deep aquifers.

Table 2. Correlation matrix of hydrochemical parameters.

Table 3. Saturation indices of groundwater with respect to key minerals.

Table 4. Classification of irrigation water quality according to Ayers and Westcot (1985).

Table 1

| **Wet Season** | | | | **Deep Aquifer** | | | | | | | | | | | |
| --- | --- | --- | --- | --- | --- | --- | --- | --- | --- | --- | --- | --- | --- | --- | --- |
| **Gallery Inflow** | | | |  | **IGK** | | | **MO1** | | | |
| Parameters | Unit | ITHASY (2005) | WHO  (2022) | Mean | Max | Min | Std | Mean | Max | Min | Std | Mean | Max | Min | Std |
| pH |  | 6.5-5.5 | 6.5-5.5 | 7.7 | 7.8 | 7.6 | 0.1 | 7.5 | 7.6 | 7.3 | 0.2 | 8.72 | 8.92 | 8.56 | 0.12 |
| Electrical Cond. | µS/cm | 2500 | 750-1500 | 1852.8 | 2610.0 | 878.0 | 655.9 | 981.5 | 1445.0 | 518.0 | 463.5 | 2670 | 7570 | 870 | 2831.74 |
| Ca | mg/L |  | 75-200 | 208.8 | 569.8 | 53.2 | 164.5 | 257.7 | 568.0 | 39.9 | 225.3 | 3.09 | 3.49 | 2.43 | 0.47 |
| Mg | mg/L |  | 30-50 | 80.0 | 188.3 | 26.9 | 48.6 | 76.5 | 201.2 | 7.3 | 88.3 | 1.18 | 1.37 | 0.834 | 0.24 |
| Na | mg/L | 250 | 50-200 | 218.5 | 404.6 | 81.5 | 101.3 | 184.6 | 300.9 | 56.5 | 100.1 | 225.33 | 282 | 177 | 43.26 |
| K | mg/L | 12 | 12 | 19.8 | 44.5 | 8.3 | 10.6 | 17.6 | 24.8 | 3.5 | 10.0 | 3.01 | 3.24 | 2.78 | 0.17 |
| CI | mg/L | 250 | 250-400 | 36.6 | 59.6 | 23.5 | 10.7 | 79.7 | 176.7 | 27.0 | 68.7 | 42.26 | 67.6 | 28 | 17.96 |
| SO4 | mg/L | 250 | 200-400 | 1004.4 | 2053.0 | 427.8 | 489.9 | 1096.9 | 2629.0 | 116.4 | 1097.4 | 14.13 | 19.2 | 8.72 | 3.77 |
| HCO3 | mg/L | - | 300 | 250.1 | 384.0 | 57.0 | 87.2 | 202.0 | 310.0 | 82.0 | 93.5 | 454.33 | 531 | 385 | 59.82 |
| As | mg/L | 0.01 | 0.01 | 0.1 | 18.0 | <0.01 | 7.8 | <0.01 | <0.01 | <0.01 |  | 0.108 | 0.159 | 0.019 | 0.062 |
| B | mg/L | 1.0 |  | 2.1 | 2.9 | 0.6 | 0.7 | 1.6 | 3.6 | 0.2 | 1.4 | 1.003 | 1.2 | 0.749 | 0.18 |
| Oxygen 18(%0) |  |  |  | -44.91 |  |  |  |  |  |  |  | -7.99 | -7.73 | -8.13 | 0.18 |
| Deuterium (%0) |  |  |  | -7.43 |  |  |  |  |  |  |  | -53.56 | -51.42 | -55.62 | 1.71 |
| Tritium (TU) |  |  |  | 1.76 |  |  |  |  |  |  |  | 1.8 |  |  |  |
|  |  |  |  |  |  |  |  |  |  |  |  |  |  |  |  |
| **Dry Season** | | | | **Gallery Inflow** | | | |  | **IGK** | | | **MO1** | | | |
| Parameters | Unit | ITHASY (2005) | WHO  (2022) | Mean | Max | Min | Std | Mean | Max | Min | Std | Mean | Max | Min | Std |
| pH |  | 6.5-5.5 | 6.5-5.5 | 7.3 | 7.7 | 7.0 | 0.2 | 7.6 | 8.0 | 7.3 | 0.0 | 8.52 | 8.65 | 8.28 | 0.16 |
| Electrical Cond. | µS/cm | 2500 | 750-1500 | 2030.6 | 3590.0 | 1115.0 | 674.5 | 535.0 | 552.0 | 518.0 | 17.0 | 1843.33 | 2300 | 1240 | 444.99 |
| Ca | mg/L |  | 75-200 | 253.9 | 563.5 | 91.4 | 148.7 | 46.0 | 52.2 | 39.9 | 6.2 | 6.33 | 17.4 | 1.22 | 6.52 |
| Mg | mg/L |  | 30-50 | 97.1 | 176.9 | 46.9 | 46.2 | 12.2 | 17.1 | 7.3 | 4.9 | 1.94 | 3.2 | 0.765 | 0.92 |
| Na | mg/L | 250 | 50-200 | 387.0 | 791.5 | 81.0 | 277.8 | 44.5 | 56.5 | 32.5 | 12 | 433.25 | 543 | 269 | 102.77 |
| K | mg/L | 12 | 12 | 29.1 | 75.9 | 14.3 | 18.3 | 40.7 | 46.5 | 35 | 5.7 | 4.415 | 4.93 | 3.98 | 0.40 |
| CI | mg/L | 250 | 250-400 | 31.8 | 51.9 | 22.4 | 8.6 | 25.7 | 27.0 | 24.5 | 1.3 | 35.95 | 56.4 | 28.4 | 11.82 |
| SO4 | mg/L | 250 | 200-400 | 1166.2 | 1942.0 | 700.0 | 400.9 | 131 | 145.6 | 116.4 | 14.6 | 20.35 | 21.2 | 19.5 | 0.85 |
| HCO3 | mg/L | - | 300 | 258.1 | 355.0 | 160.0 | 42.8 | 245.0 | 250.0 | 240.0 | 5.0 | 1155 | 1200 | 1110 | 45 |
| As | mg/L | 0.01 | 0.01 | 0.015 | 0.020 | 0.004 | 0.006 | <0.01 | <0.01 | <0.01 | <0.01 | 0.063 | 0.092 | 0.021 | 0.026 |
| B | mg/L | 1.0 |  | 2.2 | 3.1 | 0.1 | 0.8 | 0.1 | 0.2 | 0.1 | 0.0 | 2.5675 | 3.37 | 1.31 | 0.79 |

Table (cond.)

| **Wet Season** | | | | **Surface Aquifer** | | | | | | | | | | | | | | | | | | | |
| --- | --- | --- | --- | --- | --- | --- | --- | --- | --- | --- | --- | --- | --- | --- | --- | --- | --- | --- | --- | --- | --- | --- | --- |
| **WS1** | | | | | **PG1** | | | | **PG2** | | | **K1** | | | | **W2** | | | |
| Parameters | Unit | ITHASY (2005) | WHO  (2022) | Mean | Max | Min | Std | Mean | Max | Min | Std | Mean | Max | Min | Std | Mean | Max | Min | Std | Mean | Max | Min | Std |
| pH |  | 6.5-5.5 | 6.5-5.5 | 7.3 | 7.3 | 7.3 | 0 | 7.74 | 8.22 | 6.6 | 0.67 | 7.9 | 7.58 | 7.58 | 0.26 | 7.75 | 7.93 | 7.56 | 0.18 | 7.45 | 7.58 | 7.18 | 0.19 |
| Electrical Cond. | µS/cm | 2500 | 750-1500 | 477 | 690 | 357 | 151 | 461.25 | 780 | 327 | 184.89 | 517 | 302 | 302 | 232.54 | 487.25 | 840 | 346 | 204.2 | 546.43 | 840 | 156.3 | 287.35 |
| Ca | mg/L |  | 75-200 | 61.3 | 90.9 | 42.1 | 18.1 | 41.89 | 55.58 | 28.8 | 9.47 | 28.95 | 13.2 | 13.2 | 11.34 | 34.37 | 42.23 | 13.2 | 12.25 | 14 | 20.79 | 8 | 5.25 |
| Mg | mg/L |  | 30-50 | 16.6 | 20.3 | 12.8 | 2.7 | 16.94 | 20.44 | 12.6 | 2.96 | 10.7 | 4.57 | 4.57 | 4.34 | 11.64 | 17.62 | 4.57 | 4.68 | 9.4 | 13.62 | 4.57 | 3.72 |
| Na | mg/L | 250 | 50-200 | 56.5 | 56.5 | 56.5 | 0 | 16.55 | 19.14 | 14.3 | 1.91 | 14.79 | 6.92 | 6.92 | 5.75 | 13.5 | 16.23 | 6.92 | 3.82 | 10.26 | 13.87 | 6.92 | 2.84 |
| K | mg/L | 12 | 12 | 4.1 | 4.6 | 3.5 | 0.6 | 4.13 | 5.02 | 2.91 | 0.89 | 4.18 | 2.4 | 2.4 | 1.33 | 4.09 | 4.94 | 2.4 | 1.03 | 7.45 | 7.58 | 7.18 | 0.19 |
| CI | mg/L | 250 | 250-400 | 14.3 | 16.3 | 13 | 1.4 | 15.33 | 23 | 9.8 | 4.79 | 15.07 | 10.7 | 10.7 | 3.25 | 18.8 | 28.69 | 10.7 | 7.45 | 14.61 | 21.14 | 10.7 | 4.65 |
| SO4 | mg/L | 250 | 200-400 | 116.4 | 116.4 | 116.4 | 0 | 11.98 | 15.7 | 9.43 | 2.34 | 15.3 | 10.1 | 10.1 | 4.21 | 13.84 | 20.4 | 8.34 | 4.62 | 25.71 | 31.73 | 20.4 | 4.65 |
| HCO3 | mg CaCO3/L | - | 300 | 207.85 | 230 | 172 | 21.99 | 215.4 | 245 | 174 | 29.17 | 149.13 | 76.4 | 76.4 | 55.18 | 174.22 | 224.48 | 76.4 | 57.52 | 111.91 | 130 | 76.4 | 25.11 |
| As | mg/L | 0.01 | 0.01 | 2.56 | 10.2 | 2.56 | 4.4 | 0.01 | 0.01 | 0.01 | 0 | 0.0085 | 0.006 | 0.006 | 0 | 0.01 | 0.012 | 0.0095 | 0 | <0.01 | <0.01 | <0.01 | <0.01 |
| B | mg/L | 1.0 |  | < 0.1 | < 0.1 | < 0.1 | < 0.1 | < 0.1 | < 0.1 | < 0.1 | < 0.1 | < 0.1 | < 0.1 | < 0.1 | < 0.1 | < 0.1 | < 0.1 | < 0.1 | < 0.1 | < 0.1 | < 0.1 | < 0.1 | < 0.1 |
| Oxygen 18(%0) |  |  |  |  |  |  |  |  |  |  |  |  |  |  |  |  |  |  |  | -44.09 |  |  |  |
| Deuterium (%0) |  |  |  |  |  |  |  |  |  |  |  |  |  |  |  |  |  |  |  | -7.3 |  |  |  |
| Tritium (TU) |  |  |  |  |  |  |  |  |  |  |  |  |  |  |  |  |  |  |  | 2.4 |  |  |  |
|  |  |  |  |  |  |  |  |  |  |  |  |  |  |  |  |  |  |  |  |  |  |  |  |
| **Dry Season** | | | | **WS1** | | | | | **PG1** | | | | **PG2** | | | **K1** | | | | **W2** | | | |
| Parameters | Unit | ITHASY (2005) | WHO  (2022) | Mean | Max | Min | Std | Mean | Max | Min | Std | Mean | Max | Min | Std | Mean | Max | Min | Std | Mean | Max | Min | Std |
| pH |  | 6.5-5.5 | 6.5-5.5 | 7.3 | 7 | 7.7 | 0.2 | 7.81 | 7.92 | 7.58 | 0.14 | 8.06 | 8.49 | 7.69 | 0.3 | 7.99 | 8.1 | 7.95 | 0.06 | 7.4 | 7.68 | 6.87 | 0.37 |
| Electrical Cond. | µS/cm | 2500 | 750-1500 | 470.3 | 619 | 360 | 95 | 514 | 840 | 365 | 192.08 | 460.5 | 760 | 331 | 174 | 457.5 | 740 | 286 | 170.09 | 340.27 | 600 | 191.8 | 184.29 |
| Ca | mg/L |  | 75-200 | 47.2 | 60.5 | 30 | 11 | 36.83 | 46.16 | 13.2 | 13.69 | 38.96 | 44.44 | 28.1 | 6.37 | 35.19 | 50.92 | 26.86 | 11.13 | 18 | 19.1 | 16.9 | 1.1 |
| Mg | mg/L |  | 30-50 | 17.1 | 20.1 | 13.6 | 2.9 | 13.62 | 18.68 | 4.57 | 6.41 | 14.4 | 15.98 | 12.3 | 1.55 | 16.01 | 18.8 | 12.2 | 2.79 | 10.37 | 14.6 | 8.13 | 3 |
| Na | mg/L | 250 | 50-200 | 19.2 | 31.4 | 14 | 7.1 | 14.91 | 20.2 | 6.92 | 4.89 | 16.67 | 18.87 | 14.1 | 1.81 | 14.43 | 17.28 | 10.5 | 2.55 | 14.83 | 20.5 | 11.7 | 4.01 |
| K | mg/L | 12 | 12 | 5.5 | 7.7 | 0.9 | 2.7 | 4.59 | 5.97 | 2.4 | 1.34 | 4.35 | 5.23 | 2.75 | 0.95 | 4.72 | 5.88 | 2.87 | 1.13 | 5.1 | 8.16 | 3.57 | 2.16 |
| CI | mg/L | 250 | 250-400 | 16.9 | 27.2 | 12 | 6 | 19.85 | 26.18 | 10.7 | 5.65 | 18.65 | 28.19 | 14 | 5.73 | 15.39 | 23 | 8.95 | 5.14 | 13.23 | 18.5 | 9.6 | 3.81 |
| SO4 | mg/L | 250 | 200-400 | 14 | 20 | 10.4 | 4 | 14.8 | 20.4 | 10.71 | 3.72 | 10.7 | 13 | 6.79 | 2.34 | 17.83 | 25.8 | 11.6 | 5.28 | 9.37 | 14.3 | 5.9 | 3.58 |
| HCO3 | mg CaCO3/L | - | 300 | 249.1 | 307.4 | 205 | 36.9 | 186.55 | 242 | 76.4 | 65.85 | 185.85 | 219.6 | 170 | 20.28 | 187.6 | 220 | 151 | 27.06 | 116.17 | 124 | 106.2 | 7.42 |
| As | mg/L | 0.01 | 0.01 | 0.0046 | 0.0137 | 0 | 0.0064 | 0.01 | 0.01 | 0.01 | 0 | 0.01 | 0.0084 | 0.0055 | 0 | 0.01 | 0.01 | 0.0077 | 0.00115 | <0.01 | <0.01 | <0.01 | <0.01 |
| B | mg/L | 1.0 |  | 2.2 | 0.1 | 3.1 | 0.1 | < 0.1 | < 0.1 | < 0.1 | < 0.1 | < 0.1 | < 0.1 | < 0.1 | < 0.1 | < 0.1 | < 0.1 | < 0.1 | < 0.1 | < 0.1 | < 0.1 | < 0.1 | < 0.1 |

Table 2

|  |  | **pH** | **Electrical Conductivity** | | **Ca** | **Mg** | **Na** | **K** | **HCO3** | **Cl** | **SO4** | **B** | **As** |
| --- | --- | --- | --- | --- | --- | --- | --- | --- | --- | --- | --- | --- | --- |
| **pH** |  | 1 | 0.652 | -0.338 | | -0.323 | 0.47 | -0.408 | **0.697** | 0.248 | -0.252 | 0.233 | 7.40E-02 |
| **Electrical Conductivity** | uS/cm |  | 1 | 0.351 | | 0.385 | **0.856** | 0.204 | 0.554 | 0.532 | 0.464 | **0.674** | 7.20E-02 |
| **Ca** | mg/l |  |  | 1 | | **0.984** | 0.471 | 0.556 | -0.155 | **0.646** | **0.986** | 0.535 | -0.179 |
| **Mg** | mg/l |  |  |  | | 1 | 0.485 | 0.529 | -0.164 | 0.549 | **0.98** | 0.548 | -0.252 |
| **Na** | mg/l |  |  |  | |  | 1 | 0.315 | 0.73 | 0.569 | 0.563 | **0.808** | 5.20E-02 |
| **K** | mg/l |  |  |  | |  |  | 1 | -8.20E-02 | 0.349 | 0.59 | 0.265 | -0.291 |
| **HCO3** | mg/l |  |  |  | |  |  |  | 1 | 0.269 | -7.40E-02 | 0.585 | 0.163 |
| **Cl** | mg/l |  |  |  | |  |  |  |  | 1 | **0.675** | 0.541 | 4.80E-02 |
| **SO4** | mg/l |  |  |  | |  |  |  |  |  | 1 | 0.582 | -0.187 |
| **B** | mg/l |  |  |  | |  |  |  |  |  |  | 1 | -0.126 |
| **As** | ug/l |  |  |  | |  |  |  |  |  |  |  | 1 |

Table 3

| **Monitoring Location** | **Anhydrite** | **Aragonite** | **Calcite** | **Dolomite** | **Gypsum** | **Halite** |
| --- | --- | --- | --- | --- | --- | --- |
| Gallery Inflow | -0.7718 | 0.4264 | 0.5739 | 1.0102 | -0.535 | -6.737 |
| Gallery Inflow_Wet | -0.6827 | 0.099 | 0.2464 | 0.355 | -0.446 | -6.563 |
| IGK | -0.6644 | 0.2163 | 0.3637 | 0.4786 | -0.4276 | -6.476 |
| IGK_Wet | -1.9098 | -0.0279 | 0.0679 | -0.1584 | -1.6727 | -7.5015 |
| K1 | -2.8926 | -0.3038 | -0.1563 | -0.4986 | -2.6554 | -8.1422 |
| K1_Wet | -2.7951 | 0.1475 | 0.295 | 0.5338 | -2.5579 | -8.2033 |
| MO1 | -4.0453 | 0.0812 | 0.2286 | 0.346 | -3.8083 | -6.5934 |
| MO1_Wet | -3.747 | 0.4886 | 0.636 | 1.0742 | -3.5103 | -6.4136 |
| PG1 | -2.9051 | -0.7009 | -0.5534 | -1.2158 | -2.668 | -8.1488 |
| PG1_Wet | -2.8473 | -0.8079 | -0.6605 | -1.4691 | -2.6101 | -8.0783 |
| PG2 | -2.9037 | -0.9933 | -0.8458 | -1.8404 | -2.6665 | -8.1954 |
| PG2_Wet | -2.9679 | -0.7852 | -0.6378 | -1.4238 | -2.7307 | -8.0574 |
| W2 | -3.2858 | -0.8894 | -0.742 | -1.4398 | -3.0485 | -8.2439 |
| W2_Wet | -2.9551 | -0.974 | -0.8266 | -1.5431 | -2.7179 | -8.3605 |
| WS1 | -2.8045 | -0.2969 | -0.1494 | -0.455 | -2.5673 | -8.0453 |
| WS1_Wet | -1.8447 | -0.318 | -0.1706 | -0.6259 | -1.6075 | -7.6618 |

Table 4

| **Potential irrigation problem** | | **Unit** | **Degree of restriction on use** | | |
| --- | --- | --- | --- | --- | --- |
| None | Slight to moderate | Severe |
| Salinity  (effects crop water availability) | EC | µS/cm | < 700 | 700 – 3000 | > 3000 |
| TDS | mg/L | < 450 | 450 – 2000 | > 2000 |
| Permeability  (effects infiltration rate of water  into soil) | SAR = 0 – 3 | and  EC= | > 700 | 700 – 200 | < 200 |
| SAR = 3 – 6 | > 1200 | 1200 – 300 | < 300 |
| SAR = 6 – 12 | > 1900 | 1900 – 500 | < 500 |
| SAR = 12 – 20 | > 2900 | 2900 – 1300 | < 1300 |
| SAR = 20 – 40 | > 5000 | 5000 – 2900 | < 2900 |
| Specific ion toxicity  (effects sensitive crops) | Sodium1 | SAR | < 3.0 | 3.0 – 9.0 | > 9.0 |
| Chloride1 | mg/L | < 140 | 140 – 350 | > 350 |
| Boron | mg/L | < 0.7 | 0.7 – 3.0 | > 3.0 |
| Miscellaneous effects  (effects susceptible crops) | Nitrate Nitrogen | mg/L | < 5 | 5 – 30 | > 30 |
| Bicarbonate | mg/L | < 90 | 90 – 500 | > 500 |
| pH | – | Normal range 6.5 – 8.4 | | |

1 surface irrigation
